# Supplementary material for: Identification of hypermucoviscous Klebsiella pneumoniae strains via untargeted surface-enhanced Raman spectroscopy
Source: Royal Society of Chemistry journal article supplement (doi:10.1039/d4ay01137f), 2024-01-01
Supplement: d4ay01137f1.pdf [file d4ay01137f1.pdf]

**Supplementary Table S1** The Best Combination of hyperparameter for Different Machine Learning Algorithms

| <b>Algorithms</b>             | <b>Function</b>               | <b>Parameter Range</b>                                                                                                                                                  | <b>Optimum Parameter</b>                                                            |
|-------------------------------|-------------------------------|-------------------------------------------------------------------------------------------------------------------------------------------------------------------------|-------------------------------------------------------------------------------------|
| <b>AdaBoost</b>               | AdaBoostClassifier            | <b>learning_rate</b> = [0.1, 1, 0.01, 0.001],<br><b>n_estimators</b> = [50, 60, 70, 80, 90, 100, 110, 120, 130, 140, 150, 160, 170, 180]                                | <b>learning_rate</b> = 0.1,<br><b>n_estimators</b> = 180                            |
| <b>Bagging</b>                | BaggingClassifier             | <b>n_estimators</b> = [10, 30, 50, 70, 80, 120, 130, 140, 145, 150, 160, 170, 175, 180, 185],<br><b>max_features</b> = range (1, 10)                                    | <b>n_estimators</b> = 150,<br><b>max_features</b> = 8                               |
| <b>Decision Tree</b>          | DecisionTreeClassifier        | <b>criterion</b> = ['gini', 'entropy'],<br><b>max_depth</b> = range (1, 30),<br><b>max_features</b> = [21, 22, 23, 24, 25, 26, 28, 29, 30, 'auto']                      | <b>criterion</b> = 'entropy',<br><b>max_depth</b> = 14,<br><b>max_features</b> = 29 |
| <b>LDA</b>                    | LinearDiscriminantAnalysis    | <b>solver</b> = ['eigen', 'lsqr'],<br><b>shrinkage</b> = [0.01, 0.1, 0.2, 0.3, 0.4, 0.5, 0.6, 0.7, 0.8, 0.9, 'auto']                                                    | <b>solver</b> ='eigen',<br><b>shrinkage</b> = 0.03                                  |
| <b>Quadratic Discriminant</b> | QuadraticDiscriminantAnalysis | <b>reg_param</b> = np.linspace(0, 1, 10),<br><b>tol</b> = [0.0001, 0.001, 0.01, 0.1, 1]                                                                                 | <b>reg_param</b> = 0.88,<br><b>tol</b> = 0.0001                                     |
| <b>Random Forest</b>          | RandomForestClassifier        | <b>Criterion</b> = ['gini', 'entropy'],<br><b>max_depth</b> = range (1, 10),<br><b>n_estimators</b> = [50, 60, 70, 80, 90, 100, 110, 120, 130, 140, 150, 160, 170, 180] | <b>criterion</b> = 'entropy',<br><b>max_depth</b> = 8,<br><b>n_estimators</b> = 150 |

|                |               |                                                                                                                                                   |                                                                               |
|----------------|---------------|---------------------------------------------------------------------------------------------------------------------------------------------------|-------------------------------------------------------------------------------|
| <b>SVM</b>     | SVC           | <b>Cs</b> = [0.0001, 0.001, 0.01,<br>0.1, 1, 2, 3, 4, 5, 10],<br><b>gamma</b> = [0.0001, 0.001,<br>0.01, 0.1, 1],<br>kernel = ['rbf', 'linear']   | <b>Cs</b> = 0.001,<br><b>gamma</b> =<br>0.001,<br><b>kernel</b> =<br>'linear' |
| <b>XGBoost</b> | XGBClassifier | <b>n_estimators</b> = [50, 60, 70,<br>80, 90, 100, 110, 120, 130,<br>140, 150, 160, 170, 180],<br><b>learning_rate</b> = [0.1, 1,<br>0.01, 0.001] | <b>estimators</b> =<br>100,<br><b>learning_rate</b><br>= 0.01                 |
