# Supplementary material for: Identification of hypermucoviscous Klebsiella pneumoniae strains via untargeted surface-enhanced Raman spectroscopy
Source: Royal Society of Chemistry journal article supplement (doi:10.1039/d4ay01137f), 2024-01-01
Supplement: d4ay01137f2.pdf [file d4ay01137f2.pdf]

**Supplementary Table S2** Band assignments of characteristic peaks to potential metabolites in SERS spectra for *K. pneumoniae*.

| <b>Wavenumber (cm<sup>-1</sup>)</b> | <b>Band Assignment</b>                                    | <b>Ref.</b>                  |
|-------------------------------------|-----------------------------------------------------------|------------------------------|
| 653                                 | Guanine vibration or COO <sup>-</sup> bending in tyrosine | (Bashir et al., 2021b)       |
| 730                                 | Adenine                                                   | (Chen et al., 2019)          |
| 957                                 | C-N and C-O                                               | (Zhao et al., 2023)          |
| 1218                                | Amide III                                                 | (Bashir et al., 2021a)       |
| 1275                                | Amide III                                                 | (Tsuboi and Thomas Jr, 1997) |
| 1328                                | CH <sub>2</sub> CH <sub>3</sub> wagging mode              | (Wang et al., 2021)          |
| 1373                                | Breathing modes of DNA/RNA                                | (Lu et al., 2012)            |
| 1454                                | CH <sub>2</sub> stretching                                | (Lu et al., 2011)            |
| 1579                                | Guanine and adenine                                       | (Liu et al., 2014)           |
| 1690                                | Amide I                                                   | (Ullah et al., 2022)         |

## Reference

- Bashir, S., Nawaz, H., Majeed, M.I., Mohsin, M., Abdullah, S., Ali, S., Rashid, N., Kashif, M., Batool, F., Abubakar, M.J.P., and Therapy, P. (2021a). Rapid and sensitive discrimination among carbapenem resistant and susceptible E. coli strains using Surface Enhanced Raman Spectroscopy combined with chemometric tools. 34, 102280.
- Bashir, S., Nawaz, H., Majeed, M.I., Mohsin, M., Nawaz, A., Rashid, N., Batool, F., Akbar, S., Abubakar, M., Ahmad, S.J.S.a.P.a.M., and Spectroscopy, B. (2021b). Surface-enhanced Raman spectroscopy for the identification of tigecycline-resistant E. coli strains. 258, 119831.
- Chen, X., Tang, M., Liu, Y., Huang, J., Liu, Z., Tian, H., Zheng, Y., De La Chapelle, M.L., Zhang, Y., and Fu, W.J.M.A. (2019). Surface-enhanced Raman scattering method for the identification of methicillin-resistant Staphylococcus aureus using positively charged silver nanoparticles. 186, 1-8.
- Liu, H., Xu, Q., Huo, L., Wei, X., and Ling, J.J.F.M. (2014). Chemical composition of Enterococcus faecalis in biofilm cells initiated from different physiologic states. 59, 447-453.
- Lu, X., Rasco, B.A., Jabal, J.M., Aston, D.E., Lin, M., Konkel, M.E.J.A., and Microbiology, E. (2011). Investigating antibacterial effects of garlic (*Allium sativum*) concentrate and garlic-derived organosulfur compounds on *Campylobacter jejuni* by using Fourier transform infrared spectroscopy, Raman spectroscopy, and electron microscopy. 77, 5257-5269.
- Lu, X., Weakley, A.T., Aston, D.E., Rasco, B.A., Wang, S., and Konkel, M.E.J.J.O.a.M. (2012). Examination of nanoparticle inactivation of *Campylobacter jejuni* biofilms using infrared and Raman spectroscopies. 113, 952-963.
- Tsuboi, M., and Thomas Jr, G.J.J.a.S.R. (1997). Raman scattering tensors in biological molecules and their assemblies. 32, 263-299.
- Ullah, R., Khan, S., Ali, Z., Ali, H., Ahmad, A., Ahmed, I.J.P., and Therapy, P. (2022). Evaluating the performance of multilayer perceptron algorithm for tuberculosis

disease Raman data. 39, 102924.

Wang, W., Kang, S., Vikesland, P.J.J.E.S., and Technology (2021). Surface-enhanced Raman spectroscopy of bacterial metabolites for bacterial growth monitoring and diagnosis of viral infection. 55, 9119-9128.

Zhao, Y., Zhang, Z., Ning, Y., Miao, P., Li, Z., Wang, H.J.S.a.P.a.M., and Spectroscopy, B. (2023). Simultaneous quantitative analysis of Escherichia coli, Staphylococcus aureus and Salmonella typhimurium using surface-enhanced Raman spectroscopy coupled with partial least squares regression and artificial neural networks. 293, 122510.
